# Supplementary material for: Dihypoiodites stabilised by 4-ethylpyridine through O–I–N halogen bonds
Source: Royal Society of Chemistry journal article supplement (doi:10.1039/d1dt03324g), 2021-01-01
Supplement: d1dt03324g1.pdf [file d1dt03324g1.pdf]

## Supporting Information

### Dihypoiodites Stabilized by 4-ethylpyridine Through an O-I-N Halogen Bond

Eric Kramer,<sup>a</sup> Shilin Yu,<sup>a</sup> Jas S. Ward<sup>a\*</sup> and Kari Rissanen<sup>a\*</sup>

<sup>a</sup> University of Jyväskylä, Department of Chemistry, Jyväskylä 40014, Finland.

E-mail: [james.s.ward@jyu.fi](mailto:james.s.ward@jyu.fi), [kari.t.rissanen@jyu.fi](mailto:kari.t.rissanen@jyu.fi)

#### Contents

|                                                               |     |
|---------------------------------------------------------------|-----|
| Synthesis.....                                                | S2  |
| General Considerations .....                                  | S2  |
| Synthesis of Precursor Silver(I) Salts.....                   | S3  |
| Synthesis of O–I–N Compounds .....                            | S4  |
| Comparison Table of <sup>15</sup> N NMR Chemical Shifts ..... | S7  |
| NMR Spectra.....                                              | S8  |
| Computational Details .....                                   | S18 |
| General Considerations .....                                  | S18 |
| XRD Comparison Table .....                                    | S18 |
| Computational structures.....                                 | S19 |
| Cartesian Coordinates .....                                   | S21 |
| References .....                                              | S27 |

# Synthesis

## General Considerations

All reagents and solvents were obtained from commercial suppliers and used without further purification. For structural NMR assignments,  $^1\text{H}$  NMR and  $^1\text{H}$ - $^{15}\text{N}$  NMR correlation spectra were recorded on a Bruker Avance III 500 MHz spectrometer at 25°C in  $\text{CD}_2\text{Cl}_2$ . Chemical shifts are reported on the  $\delta$  scale in ppm using the residual solvent signal as internal standard ( $\text{CH}_2\text{Cl}_2$  in  $\text{CD}_2\text{Cl}_2$ :  $\delta_{\text{H}}$  5.32), or for  $^1\text{H}$ - $^{15}\text{N}$  NMR spectroscopy, to an external  $d_3$ - $\text{MeNO}_2$  standard. For the  $^1\text{H}$  NMR spectroscopy, each resonance was assigned according to the following conventions: chemical shift ( $\delta$ ) measured in ppm, observed multiplicity, number of hydrogens, observed coupling constant ( $J$  Hz), and assignment. Multiplicities are denoted as: s (singlet), d (doublet), t (triplet), q (quartet), sept (septet), m (multiplet), and br (broad). For the  $^1\text{H}$ - $^{15}\text{N}$  HMBC spectroscopy, spectral windows of 4 ppm ( $^1\text{H}$ ) and 600 ppm ( $^{15}\text{N}$ ) were used, with 1024 points in the direct dimension and 512 increments used in the indirect dimension.

The single crystal X-ray data for **1**, **1F**, and **2** were collected at 120 K using an Agilent SuperNova dual wavelength diffractometer with an Atlas detector using mirror-monochromated  $\text{Cu-K}\alpha$  ( $\lambda = 1.54184 \text{ \AA}$ ) radiation. The program CrysAlisPro<sup>1</sup> was used for the data collection and reduction on the SuperNova diffractometer, and the intensities were absorption corrected using a gaussian face index absorption correction method. All structures were solved by intrinsic phasing (SHELXT)<sup>2</sup> and refined by full-matrix least squares on  $F^2$  using the OLEX2,<sup>3</sup> utilizing the SHELXL-2015 module.<sup>4</sup> Anisotropic displacement parameters were assigned to non-H atoms and isotropic displacement parameters for all H atoms were constrained to multiples of the equivalent displacement parameters of their parent atoms with  $U_{\text{iso}}(\text{H}) = 1.2 U_{\text{eq}}$  (aromatic) or  $U_{\text{iso}}(\text{H}) = 1.5 U_{\text{eq}}$  (alkyl) of their respective parent atoms. The X-ray single crystal data and CCDC numbers of all new structures are included below.

The following abbreviations are used: DCM = dichloromethane,  $\text{Et}_2\text{O}$  = diethylether, TBME = <sup>t</sup>butylmethylether.

## Synthesis of Precursor Silver(I) Salts

**1,2-(AgO(O)C)<sub>2</sub>C<sub>6</sub>H<sub>4</sub>**: Phthalic acid (2.0 g, 12.0 mmol) was added to a NaOH solution (961.8 mg, 24.1 mmol in 13.3 mL H<sub>2</sub>O). After stirring with a magnetic stirrer for 15 minutes, a solution of AgNO<sub>3</sub> (4.1 g, 24.1 mmol) in H<sub>2</sub>O (16 mL) was added dropwise. A white solid appeared, and the solution was stirred for 1 hour. The precipitate was filtered and then washed with H<sub>2</sub>O, methanol, and hexane (×3 each). The white solid was dried under vacuum and stored in a vial covered with aluminium foil to protect it from light.

**1,2-(AgO(O)C)<sub>2</sub>C<sub>6</sub>F<sub>4</sub>**: Tetrafluorophthalic acid (500 mg, 2.1 mmol) was added to a NaOH solution (168 mg, 4.2 mmol in 2.3 mL H<sub>2</sub>O). After stirring with a magnetic stirrer for 15 minutes, a solution of AgNO<sub>3</sub> (713.5 mg, 4.2 mmol) in H<sub>2</sub>O (2.8 mL) was added dropwise. A white/brownish solid appeared, and the solution was stirred for 1 hour. The precipitate was filtered and then washed with H<sub>2</sub>O, methanol, and hexane (×3 each). The off-white solid was dried under vacuum and stored in a vial covered with aluminium foil to protect it from light.

**1,3-(AgO(O)C)<sub>2</sub>C<sub>6</sub>H<sub>4</sub>**: Isophthalic acid (2.0 g, 12.0 mmol) was added to a NaOH solution (961.8 mg, 24.1 mmol in 16.3 mL H<sub>2</sub>O). After stirring with a magnetic stirrer for 15 minutes and the solution filtered. To this filtered solution, a solution of AgNO<sub>3</sub> (4.1 g, 24.1 mmol) in H<sub>2</sub>O (16 mL) was added dropwise. A white solid appeared, and the solution was stirred for 1 hour. The precipitate was filtered and then washed with H<sub>2</sub>O, methanol, and hexane (×3 each). The white solid was dried under vacuum and stored in a vial covered with aluminium foil to protect it from light.

**1,4-(AgO(O)C)<sub>2</sub>C<sub>6</sub>H<sub>4</sub>**: Terephthalic acid (2.0 g, 12.0 mmol) was added to a NaOH solution (961.8 mg, 24.1 mmol in 13.3 mL H<sub>2</sub>O). After stirring with a magnetic stirrer for 15 minutes at room temperature, a solution of AgNO<sub>3</sub> (4.1 g, 24.1 mmol) in H<sub>2</sub>O (16 mL) was added dropwise. A white solid appeared, and the solution was stirred for 1 hour. The precipitate was filtered and then washed with H<sub>2</sub>O, methanol, and hexane (×3 each). The white solid was dried under vacuum and stored in a vial covered with aluminium foil to protect it from light.

## Synthesis of O–I–N Compounds

**(phthaloyl-OI)(4-Etpy)<sub>2</sub> (1)**: Neat 4-ethylpyridine (21.4 mg, 0.2 mmol) was diluted in DCM (3 mL), and this solution added to 1,2-(AgO(O)C)<sub>2</sub>C<sub>6</sub>H<sub>4</sub> (38 mg, 0.1 mmol), followed by I<sub>2</sub> (50.8 mg, 0.2 mmol) in DCM (2 mL). The mixture was sonicated, centrifuged, and filtered to give a clear red filtrate. The total volume of DCM was lowered under reduced pressure, then Et<sub>2</sub>O (18 mL) was added. A white solid appeared and the liquid was decanted off. Additional Et<sub>2</sub>O (20 mL) was added to the filtrate and the resulting solution was cooled in the fridge for 10 minutes to give a white precipitate. The solid was decanted and further dried under reduced pressure to leave a white solid. Yield: 71%. <sup>1</sup>H NMR (500 MHz, CD<sub>2</sub>Cl<sub>2</sub>) δ: 8.58 (d, *J* = 4.3 Hz, 4H), 7.50 (s, 2H), 7.33 (s, 2H), 7.24 (d, *J* = 4.8 Hz, 4H), 2.73 (q, *J* = 7.4 Hz, 4H), 1.25 (t, *J* = 7.6 Hz, 6H). <sup>15</sup>N NMR (500 MHz, CD<sub>2</sub>Cl<sub>2</sub>) δ: –160.7. Analysis Found: C, 41.10; H, 3.44; N, 4.80%. Calculated for C<sub>22</sub>H<sub>22</sub>I<sub>2</sub>N<sub>2</sub>O<sub>4</sub>·0.5(H<sub>2</sub>O): C, 41.21; H, 3.62; N, 4.37%. Crystals suitable for single crystal X-ray diffraction were obtained from a DCM solution of **1** vapour diffused with TBME. Crystal data for **1**: CCDC-2105108, C<sub>22</sub>H<sub>22</sub>I<sub>2</sub>N<sub>2</sub>O<sub>4</sub>, *M* = 632.21, colourless plate, 0.02 x 0.15 x 0.37 mm<sup>3</sup>, triclinic, space group *P*-1 (No. 2), *a* = 8.1534(3) Å, *b* = 9.6858(4) Å, *c* = 15.4795(8) Å, α = 94.664(4)°, β = 95.181(4)°, γ = 107.477(4)°, *V* = 1153.66(9) Å<sup>3</sup>, *Z* = 2, *D*<sub>calc</sub> = 1.820 gcm<sup>-3</sup>, *F*<sub>000</sub> = 612, μ = 21.66 mm<sup>-1</sup>, *T* = 120.0(1) K, θ<sub>max</sub> = 76.6°, 4475 total reflections, 3833 with *I*<sub>o</sub> > 2σ(*I*<sub>o</sub>), *R*<sub>int</sub> = 0.044, 4475 data, 273 parameters, no restraints, *Goof* = 1.04, 1.35 < *d*Δρ < –1.29 eÅ<sup>-3</sup>, *R*[*F*<sup>2</sup> > 2σ(*F*<sup>2</sup>)] = 0.043, *wR*(*F*<sup>2</sup>) = 0.127.

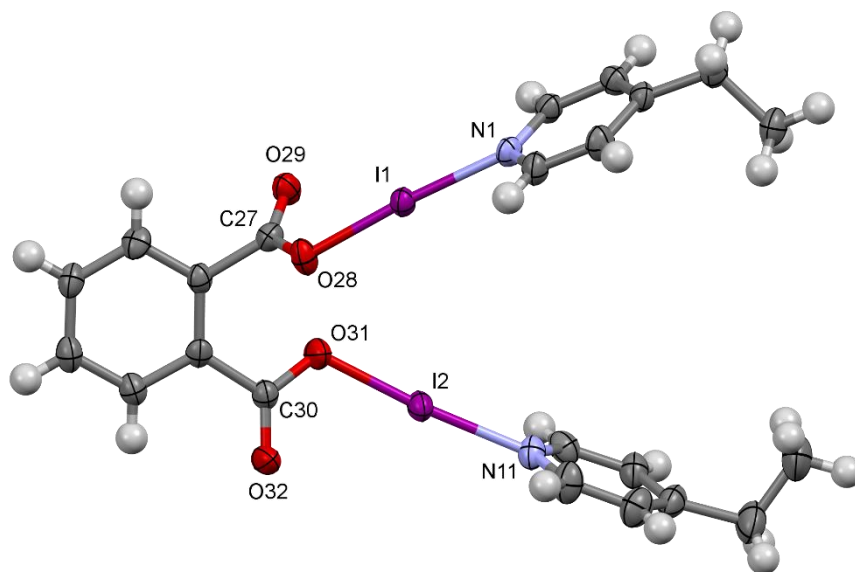

Figure S1: The X-ray crystal structure of **1** (thermal ellipsoids at 50% probability).

**(tetrafluorophthaloyl-OI)(4-Etpy)<sub>2</sub> (1F)**: Neat 4-ethylpyridine (21.4 mg, 0.2 mmol) was diluted in DCM (3.8 mL), and this solution added to 1,2-(AgO(O)C)<sub>2</sub>C<sub>6</sub>F<sub>4</sub> (23.8 mg, 0.1 mmol), followed by I<sub>2</sub> (50.8 mg, 0.2 mmol) in DCM (1.2 mL). The mixture was sonicated, centrifuged, and filtered to give a dark red filtrate. Et<sub>2</sub>O (15 mL) was added to the filtered solution and the solution was stored in the fridge. After 10 minutes a white precipitate appeared. The solution was filtered, and the recovered solid further dried under reduced pressure to give a white solid. Yield = 80%. <sup>1</sup>H NMR (500 MHz, CD<sub>2</sub>Cl<sub>2</sub>) δ: 8.59 (d, *J* = 6.1 Hz, 4H), 7.27 (d, *J* = 6.1 Hz, 4H), 2.75 (q, *J* = 7.6 Hz, 4H), 1.25 (t, *J* = 7.6 Hz, 6H). <sup>15</sup>N NMR (500 MHz, CD<sub>2</sub>Cl<sub>2</sub>) δ: -171.2. Analysis Found: C, 36.75; H, 2.45; N, 3.87%. Calculated for C<sub>22</sub>H<sub>18</sub>F<sub>4</sub>I<sub>2</sub>N<sub>2</sub>O<sub>4</sub>·0.75(H<sub>2</sub>O): C, 36.82; H, 2.74; N, 3.90%. Crystals suitable for single crystal X-ray diffraction were obtained from a DCM solution of **1F** vapour diffused with petroleum ether. Crystal data for **1F**: CCDC-2105109, C<sub>22</sub>H<sub>18</sub>F<sub>4</sub>I<sub>2</sub>N<sub>2</sub>O<sub>4</sub>, M = 704.18, colourless plate, 0.03 x 0.14 x 0.32 mm<sup>3</sup>, monoclinic, space group *P2*<sub>1</sub>/*c*, a = 9.8812(3) Å, b = 32.4911(7) Å, c = 7.4264(2) Å, β = 91.420(2)°, V = 2383.52(11) Å<sup>3</sup>, Z = 4, D<sub>calc</sub> = 1.962 gcm<sup>-3</sup>, F<sub>000</sub> = 1352, μ = 21.30 mm<sup>-1</sup>, T = 120.0(1) K, θ<sub>max</sub> = 76.2°, 4646 total reflections, 4085 with I<sub>o</sub> > 2σ(I<sub>o</sub>), R<sub>int</sub> = 0.039, 4646 data, 309 parameters, no restraints, GooF = 1.20, 2.36 < dΔρ < -1.23 eÅ<sup>-3</sup>, R[F<sup>2</sup> > 2σ(F<sup>2</sup>)] = 0.048, wR(F<sup>2</sup>) = 0.137.

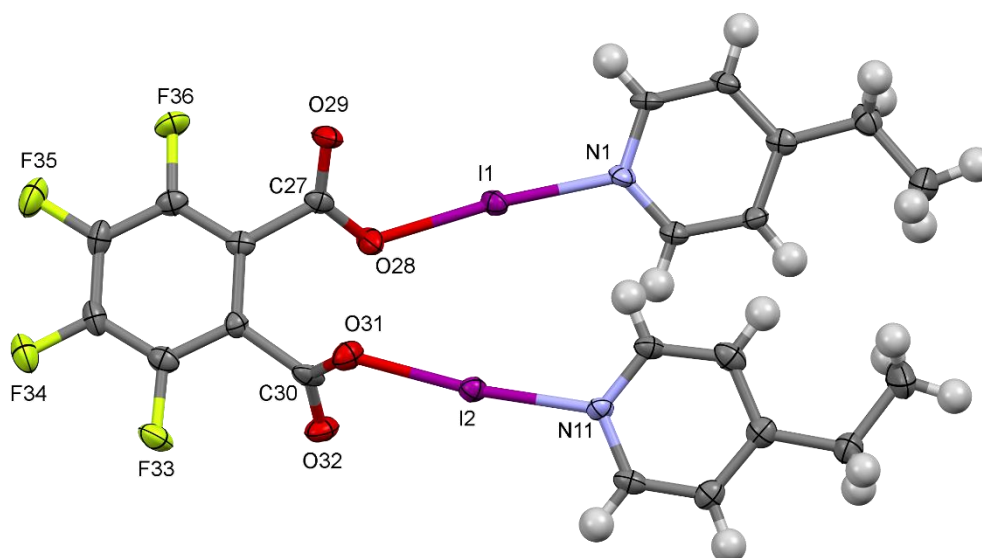

Figure S2: The X-ray crystal structure of **1F** (thermal ellipsoids at 50% probability).

**(isophthaloyl-OI)(4-Etpy)<sub>2</sub> (2)**: Neat 4-ethylpyridine (21.4 mg, 0.2 mmol) was diluted in DCM (3.8 mL), and this solution added to 1,3-(AgO(O)C)<sub>2</sub>C<sub>6</sub>H<sub>4</sub> (38 mg, 0.1 mmol), followed by I<sub>2</sub> (50.8 mg, 0.2 mmol) in DCM (1.2 mL). The mixture was sonicated, centrifuged, and filtered to give a dark red filtrate. Et<sub>2</sub>O (15mL) was added to the filtrate to immediately give a white precipitate. The solution was filtered and the white precipitate collected and dried under reduced pressure to give a white solid. Yield: 74%. <sup>1</sup>H NMR (300 MHz, CD<sub>2</sub>Cl<sub>2</sub>) δ: 8.58 (d, *J* = 6.4 Hz, 4H), 8.47 (s, 1H), 8.04 (dd, *J* = 7.6, 1.3 Hz, 2H), 7.36 (t, *J* = 7.7 Hz, 1H), 7.26 (d, *J* = 6.4 Hz, 4H), 2.74 (q, *J* = 7.6 Hz, 4H), 1.27 (t, *J* = 7.6 Hz, 6H). <sup>15</sup>N NMR (300 MHz, CD<sub>2</sub>Cl<sub>2</sub>) δ: -159.5. Analysis Found: C, 40.92; H, 3.37; N, 4.26%. Calculated for C<sub>22</sub>H<sub>22</sub>I<sub>2</sub>N<sub>2</sub>O<sub>4</sub>·0.5(H<sub>2</sub>O): C, 41.21; H, 3.62; N, 4.37%. Crystals suitable for single crystal X-ray diffraction were obtained by evaporation of a concentrated DCM solution of **2**. Crystal data for **2**: CCDC-2105110, C<sub>22</sub>H<sub>22</sub>I<sub>2</sub>N<sub>2</sub>O<sub>4</sub>, M = 632.21, colourless plate, 0.01 x 0.06 x 0.17 mm<sup>3</sup>, triclinic, space group *P*-1 (No. 2), *a* = 8.0109(5) Å, *b* = 9.0287(6) Å, *c* = 16.548(2) Å, α = 84.321(8)°, β = 87.332(8)°, γ = 71.188(6)°, *V* = 1127.23(18) Å<sup>3</sup>, *Z* = 2, *D*<sub>calc</sub> = 1.863 gcm<sup>-3</sup>, *F*<sub>000</sub> = 612, μ = 22.17 mm<sup>-1</sup>, *T* = 120.0(1) K, θ<sub>max</sub> = 75.0°, 4411 total reflections, 3134 with *I*<sub>o</sub> > 2σ(*I*<sub>o</sub>), *R*<sub>int</sub> = 0.120, 4411 data, 323 parameters, 222 restraints, GooF = 1.01, 2.11 < *d*Δρ < -1.52 eÅ<sup>-3</sup>, *R*[*F*<sup>2</sup> > 2σ(*F*<sup>2</sup>)] = 0.082, *wR*(*F*<sup>2</sup>) = 0.244.

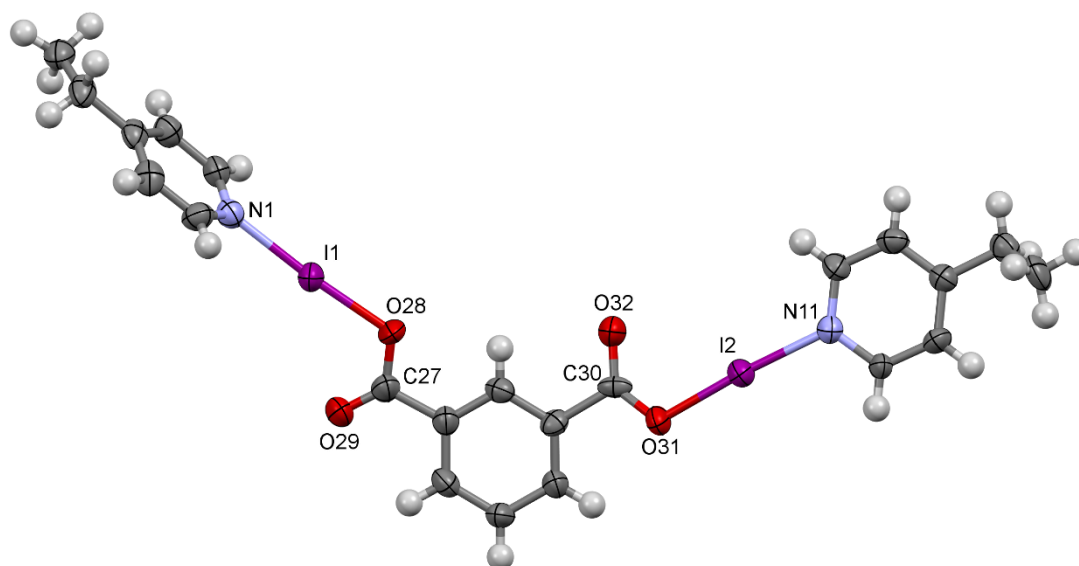

Figure S3: The X-ray crystal structure of **2** (Disordered atoms omitted for clarity; thermal ellipsoids at 50% probability).

**(terephthaloyl-OI)(4-Etpy)<sub>2</sub> (3)**: Neat 4-ethylpyridine (21.4 mg, 0.2 mmol) was diluted in DCM (3.8 mL), and this solution added to 1,4-(AgO(O)C)<sub>2</sub>C<sub>6</sub>H<sub>4</sub> (38 mg, 0.1 mmol), followed by I<sub>2</sub> (50.8 mg, 0.2 mmol) in DCM (1.2 mL). The mixture was sonicated, centrifuged, and filtered to give a dark red filtrate. Et<sub>2</sub>O (15mL) was added to the filtered solution and immediately a white precipitate appeared. The solution was filtered and the white precipitate collected and dried under reduced pressure to give a white solid. Yield: 70%. <sup>1</sup>H NMR (500 MHz, CD<sub>2</sub>Cl<sub>2</sub>) δ: 8.57 (d, *J* = 5.7 Hz, 4H), 7.91 (s, 4H), 7.26 (d, *J* = 5.3 Hz, 4H), 2.74 (q, *J* = 7.4 Hz, 4H), 1.26 (t, *J* = 7.6 Hz, 6H). <sup>15</sup>N NMR (500 MHz, CD<sub>2</sub>Cl<sub>2</sub>) δ: -162.9. Analysis Found: C, 40.93; H, 3.27; N, 4.31%. Calculated for C<sub>22</sub>H<sub>22</sub>I<sub>2</sub>N<sub>2</sub>O<sub>4</sub>·0.75(H<sub>2</sub>O): C, 40.92; H, 3.67; N, 4.34%.

**(benzoyl)(OI(4-Etpy)) (4)**: Neat 4-ethylpyridine (3.2 mg, 0.03 mmol) was diluted in CD<sub>2</sub>Cl<sub>2</sub> (832 μL), and this solution added to (AgO(O)C)C<sub>6</sub>H<sub>5</sub> (6.9 mg, 0.03 mmol),<sup>5</sup> followed by I<sub>2</sub> (7.6 mg, 0.03 mmol) in CD<sub>2</sub>Cl<sub>2</sub> (167.9 μL). The mixture was sonicated, centrifuged, and filtered to give a red filtrate, which was immediately used for NMR spectroscopy. <sup>1</sup>H NMR (500 MHz, CD<sub>2</sub>Cl<sub>2</sub>) δ: 8.55 (br, 2H), 7.94 (br, 2H), 7.45 (br, 1H), 7.36 (br, 2H), 7.25 (d, *J* = 4.4 Hz, 2H), 2.74 (br. d, *J* = 7.3 Hz, 2H), 1.26 (t, *J* = 7.6 Hz, 3H). <sup>15</sup>N NMR (500 MHz, CD<sub>2</sub>Cl<sub>2</sub>) δ: -161.6.

## Comparison Table of <sup>15</sup>N NMR Chemical Shifts

Table S1: Comparison of <sup>15</sup>N NMR Chemical Shifts in CD<sub>2</sub>Cl<sub>2</sub> for Compounds **1-4**.

| Compound  | <sup>15</sup> N NMR Chemical Shifts in CD <sub>2</sub> Cl <sub>2</sub> (ppm) |
|-----------|------------------------------------------------------------------------------|
| <b>1</b>  | -160.7                                                                       |
| <b>1F</b> | -171.2                                                                       |
| <b>2</b>  | -159.5                                                                       |
| <b>3</b>  | -162.9                                                                       |
| <b>4</b>  | -161.6                                                                       |

# NMR Spectra

Figure S4: The  $^1\text{H}$  NMR spectrum of compound **1** in  $\text{CD}_2\text{Cl}_2$ .

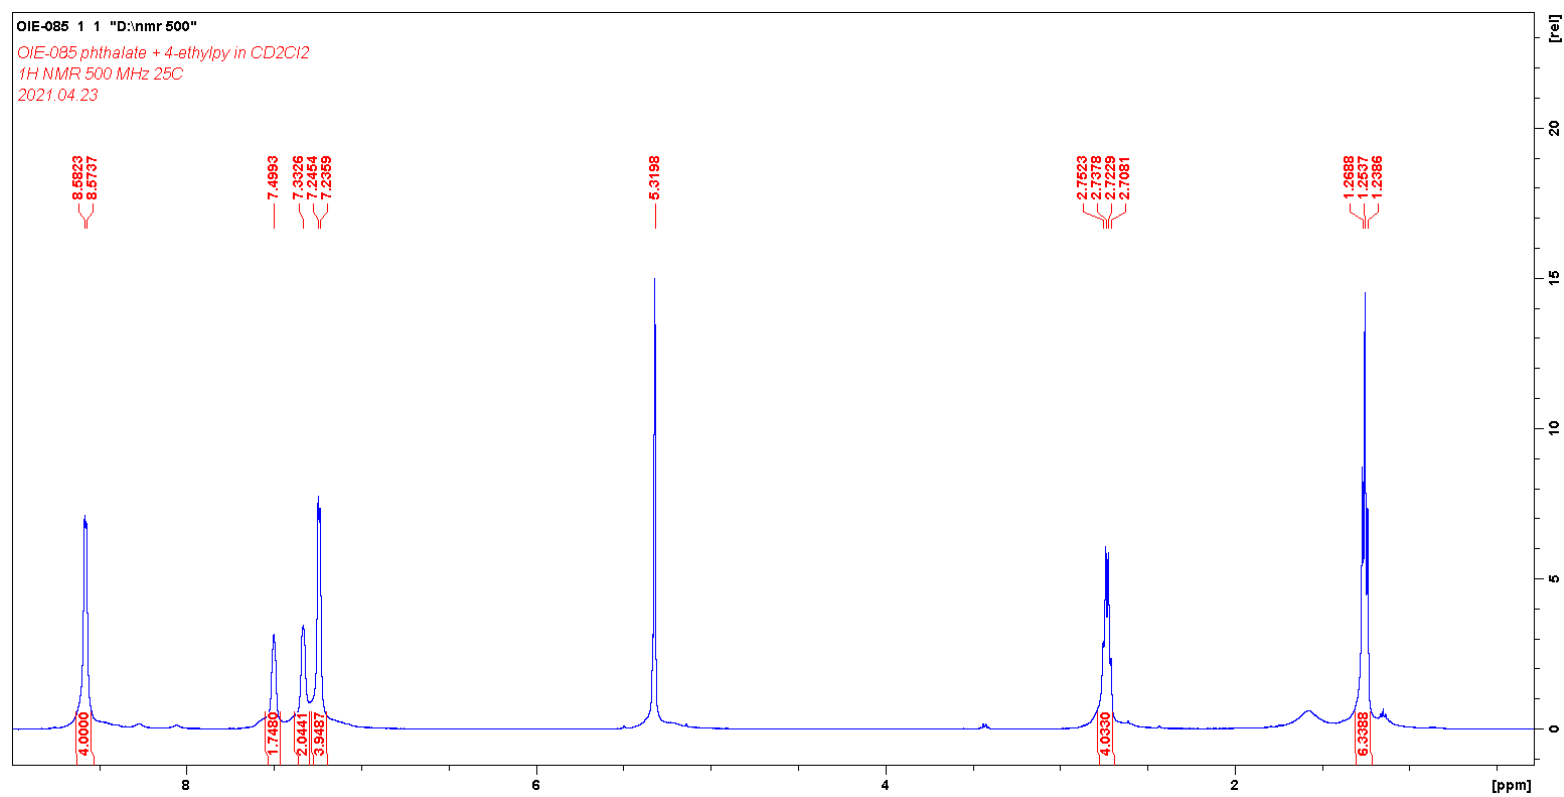



Figure S5: The  $^1\text{H}$ - $^{15}\text{N}$  HMBC spectrum of compound **1** in  $\text{CD}_2\text{Cl}_2$ .

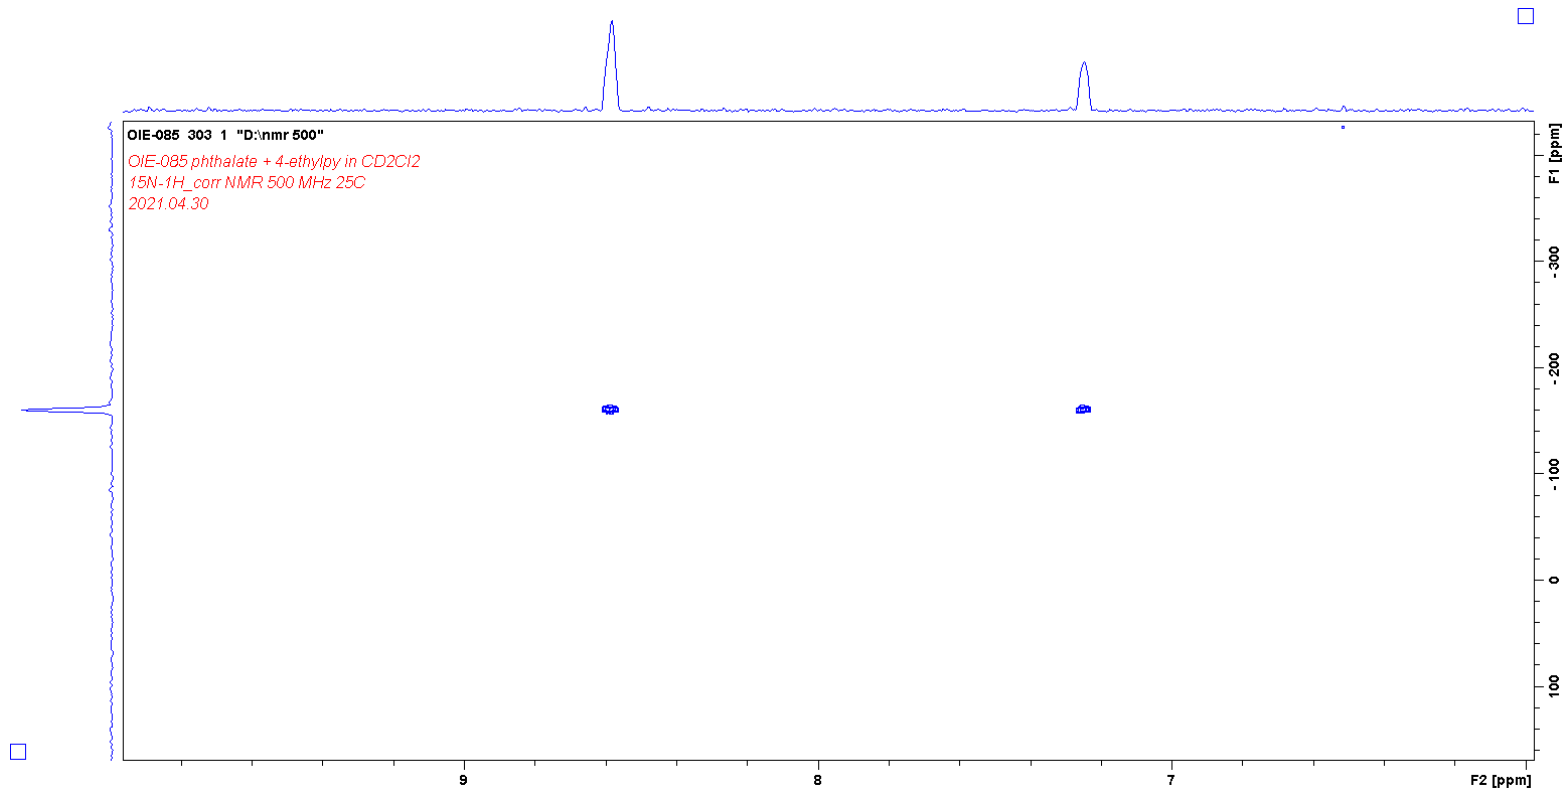

Figure S6: The  $^1\text{H}$  NMR spectrum of compound **1F** in  $\text{CD}_2\text{Cl}_2$ .

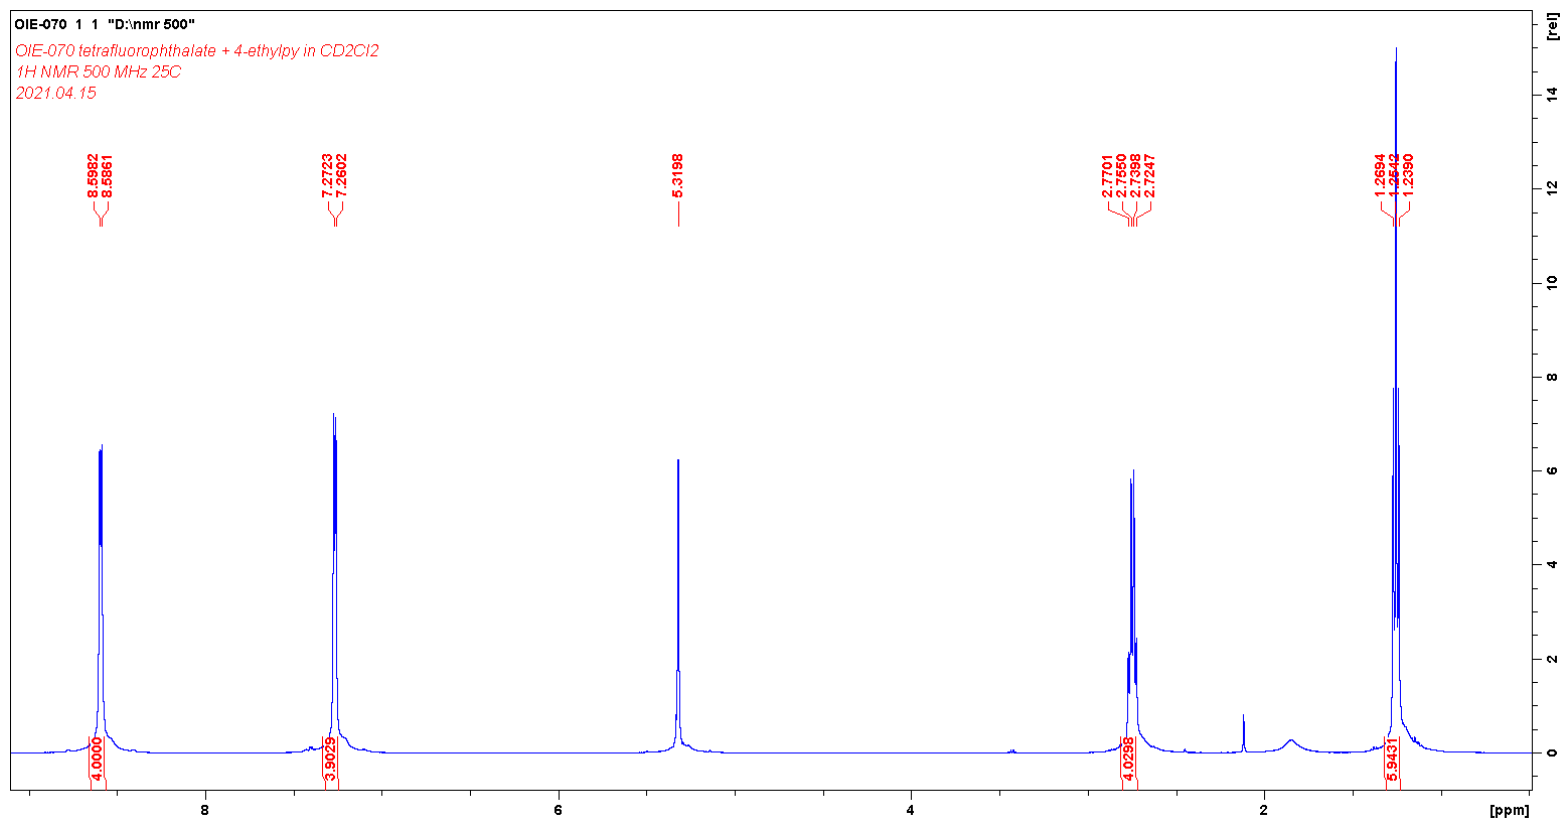

Figure S7: The  $^1\text{H}$ - $^{15}\text{N}$  HMBC spectrum of compound **1F** in  $\text{CD}_2\text{Cl}_2$ .

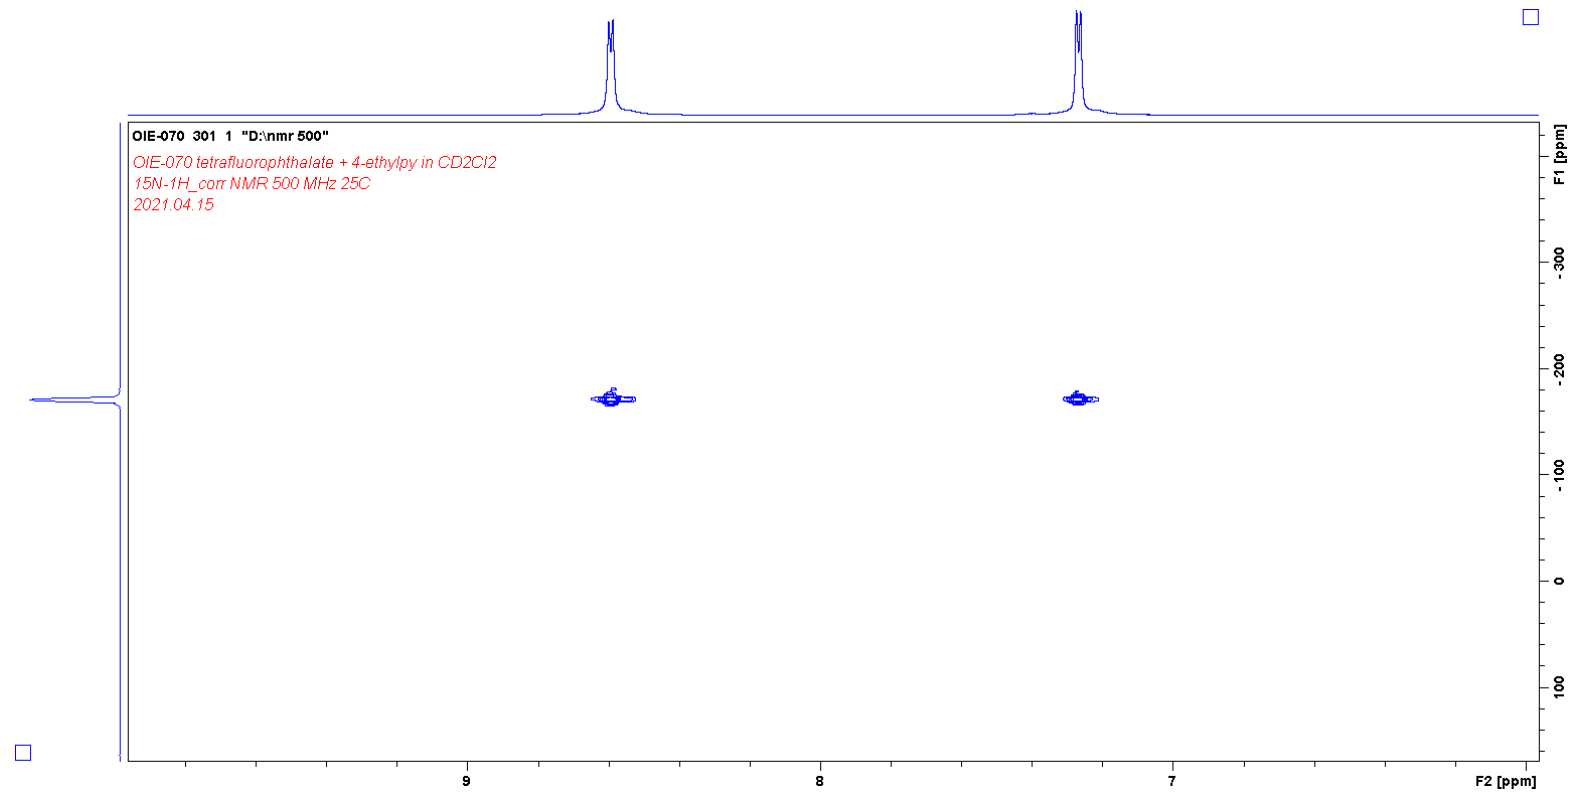

Figure S8: The <sup>1</sup>H NMR spectrum of compound **2** in CD<sub>2</sub>Cl<sub>2</sub>.

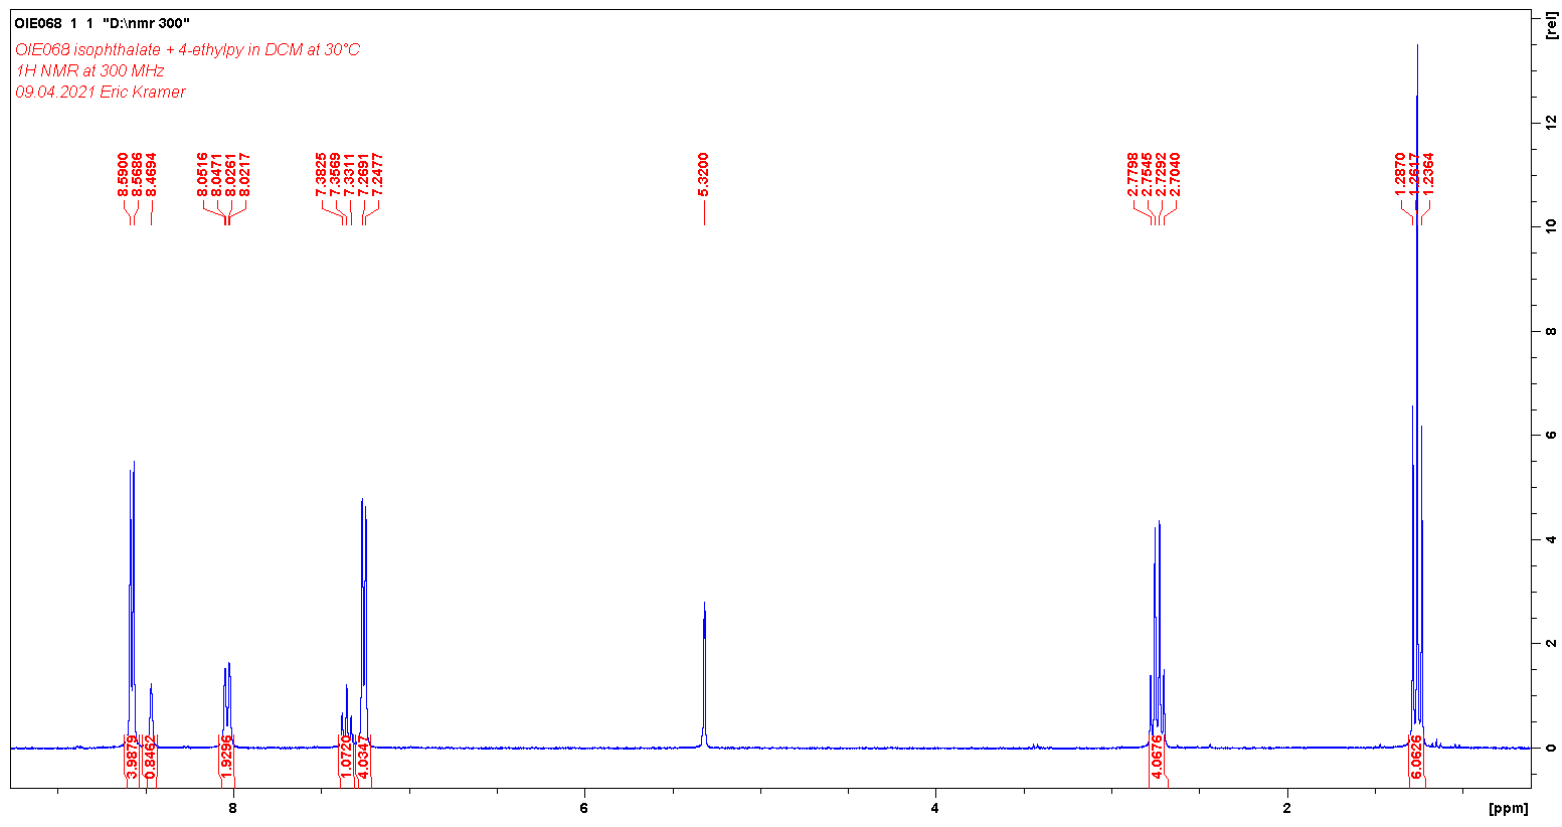

Figure S9: The  $^1\text{H}$ - $^{15}\text{N}$  HMBC spectrum of compound **2** in  $\text{CD}_2\text{Cl}_2$ .

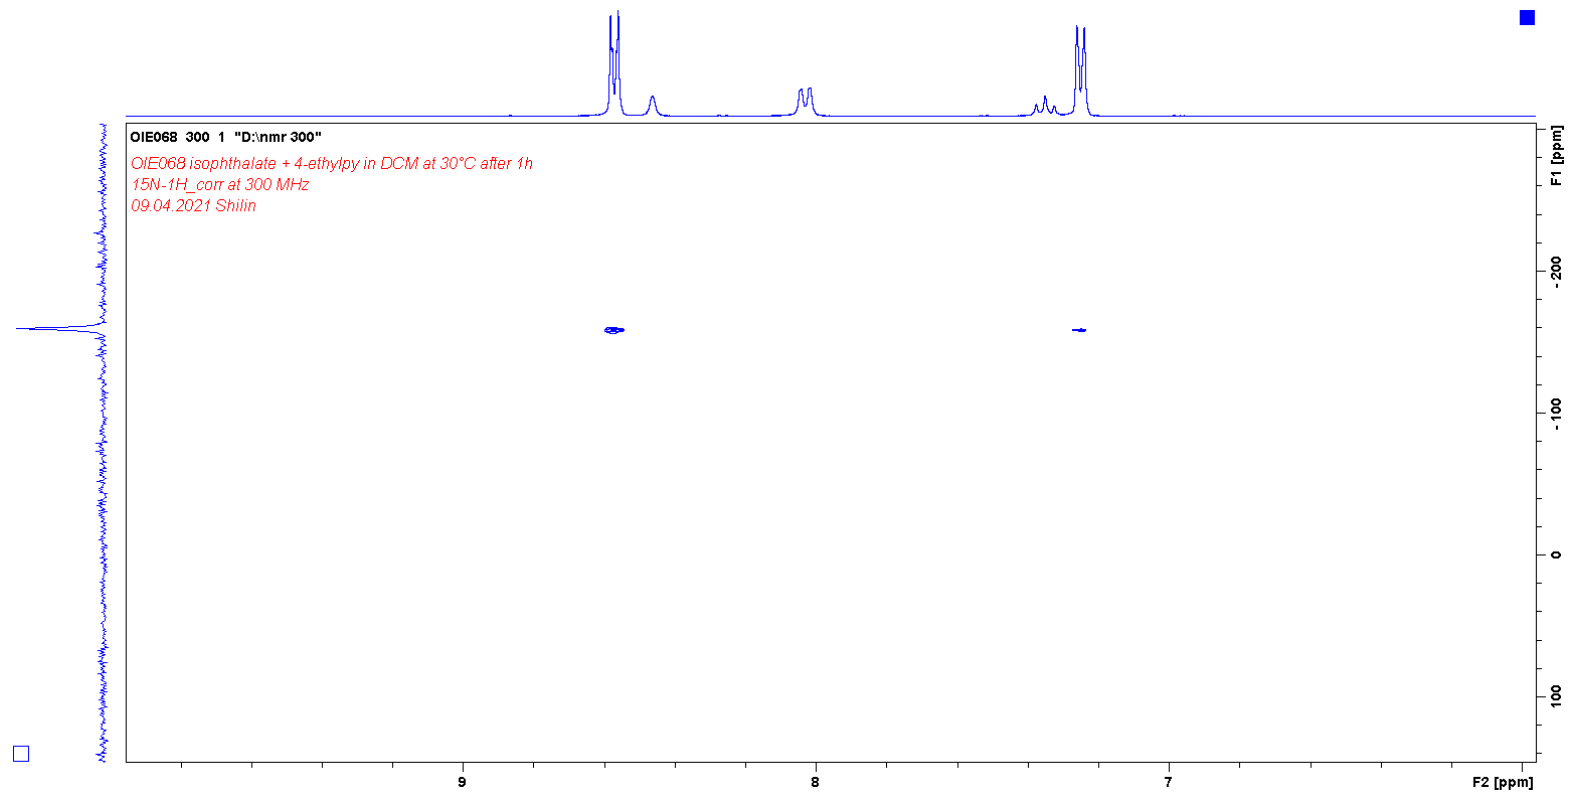

Figure S10: The  $^1\text{H}$  NMR spectrum of compound **3** in  $\text{CD}_2\text{Cl}_2$ .

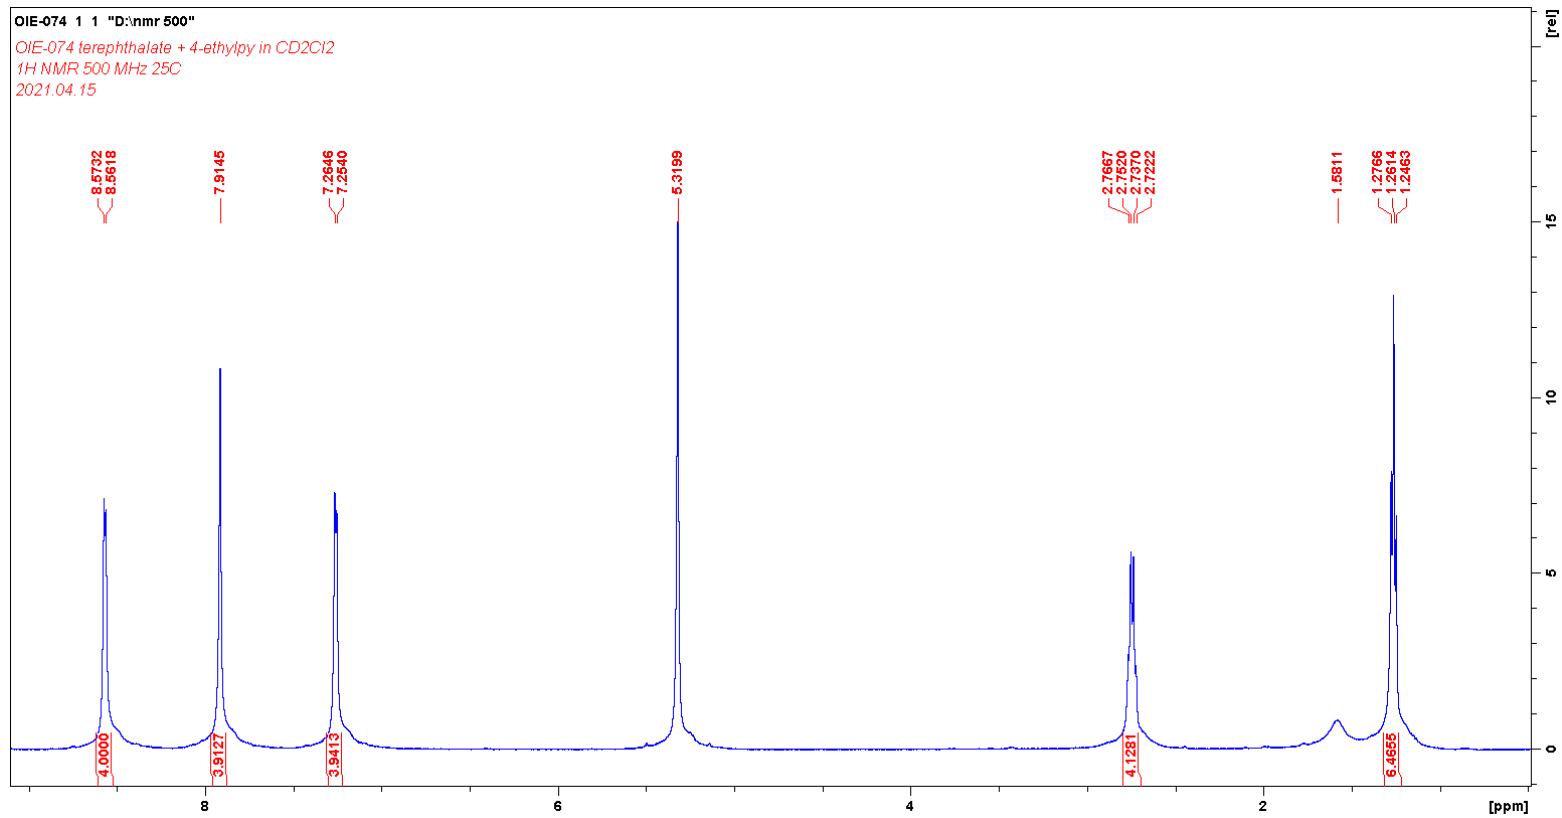

Figure S11: The  $^1\text{H}$ - $^{15}\text{N}$  HMBC spectrum of compound **3** in  $\text{CD}_2\text{Cl}_2$ .

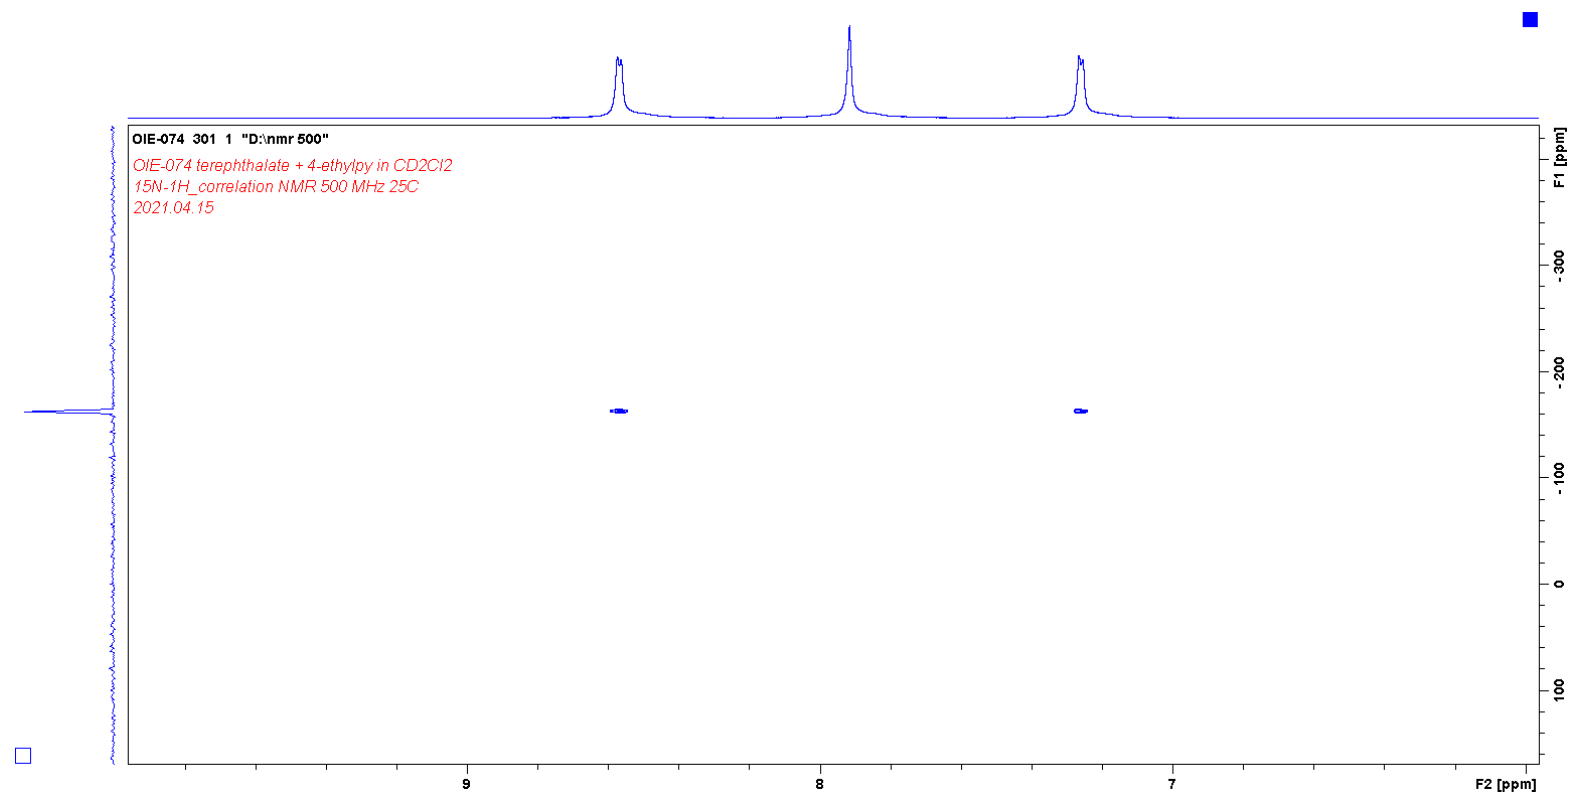

Figure S12: The  $^1\text{H}$  NMR spectrum of compound **4** in  $\text{CD}_2\text{Cl}_2$ .

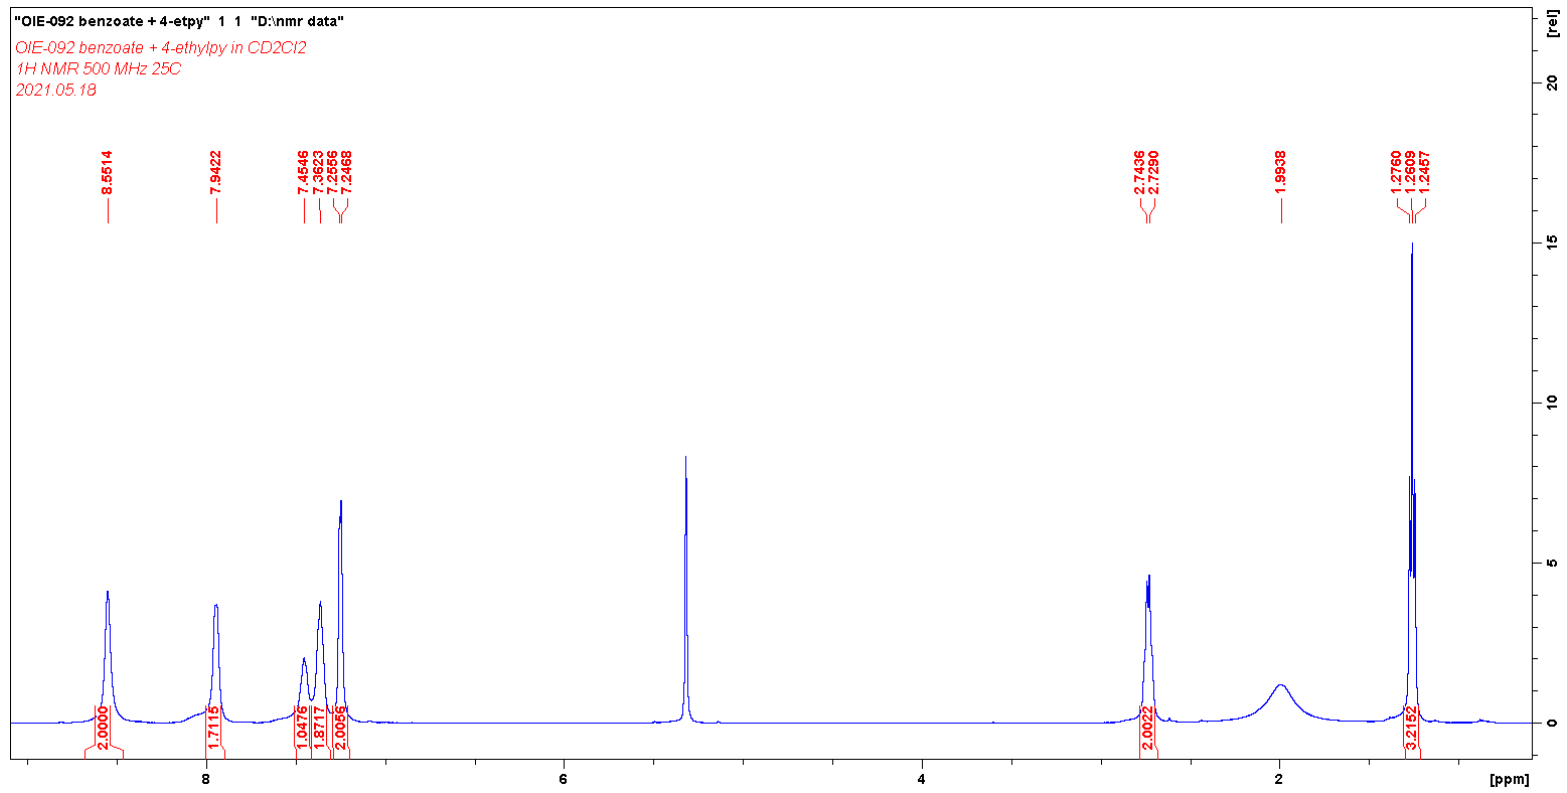



Figure S13: The  $^1\text{H}$ - $^{15}\text{N}$  HMBC spectrum of compound **4** in  $\text{CD}_2\text{Cl}_2$ .

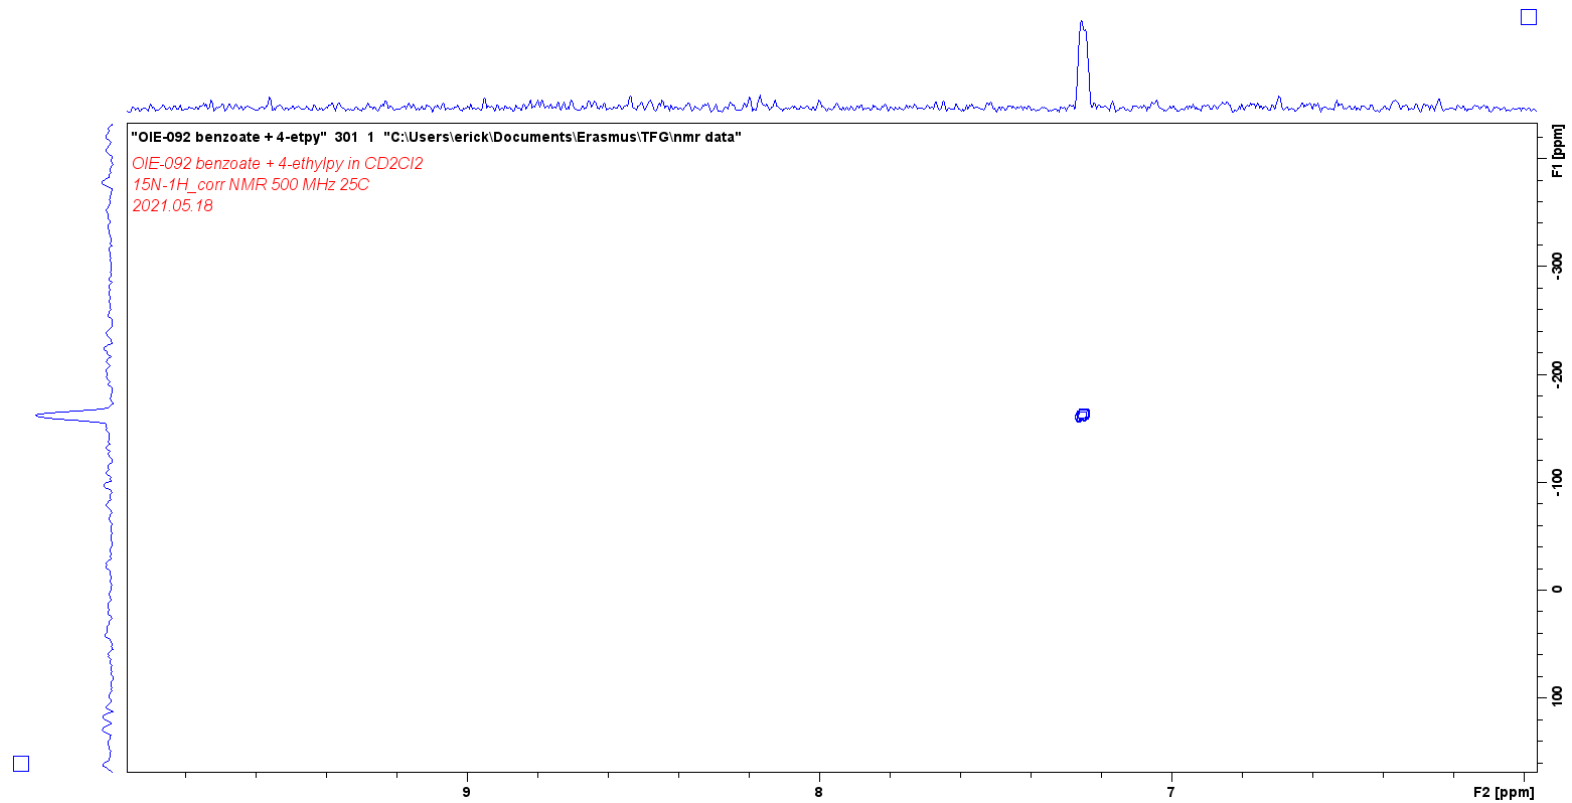

# Computational Details

## General Considerations

The geometry calculations for the complexes were done at the M06-2X/def2-TZVP level of theory<sup>6</sup> using the SPARTAN18 program<sup>7</sup> with dichloromethane (dielectric = 8.82) as the solvent using the conductor like polarizable continuum model (C-PCM).<sup>8,9</sup> The initial models were built using SPARTAN18 and optimized at the MM-level before the DFT calculations. The hypoiodite complexes **1**, **1F**, **2**, **3** and **BZPRIB** (CCDC refcode) were built up from the corresponding MM-level optimized carboxyl dihydroiodites and 4-ethylpyridine so that the N...O distance was ca. 4.7 Å and the O-I...N angle ca. 170 - 175° and then optimized with the given DFT method.

## XRD Comparison Table

Table S2: Comparison of Experimental (XRD) Versus Computational (DFT) Bond Lengths and Angles.

| Compound         | <b>1</b> | <b>1F</b> | <b>2</b> | <b>3</b> | (phthaloyl-OI)(pyridine) <sub>2</sub><br>(BZPRIB) <sup>‡5</sup> |
|------------------|----------|-----------|----------|----------|-----------------------------------------------------------------|
| <b>O-I (Å)</b>   | 2.153(5) | 2.213(6)  | 2.17(1)  | -        | 2.136                                                           |
| <b>(XRD)</b>     | 2.173(4) | 2.223(6)  | 2.18(1)  |          | 2.183                                                           |
| <b>O-I (Å)</b>   | 2.143    | 2.172     | 2.141    | 2.144    | 2.131                                                           |
| <b>(DFT)</b>     | 2.146    | 2.175     | 2.145    | 2.148    | 2.133                                                           |
| <b>I-N (Å)</b>   | 2.275(4) | 2.208(6)  | 2.25(2)  | -        | 2.282                                                           |
| <b>(XRD)</b>     | 2.305(5) | 2.223(6)  | 2.29(1)  |          | 2.324                                                           |
| <b>I-N (Å)</b>   | 2.283    | 2.260     | 2.287    | 2.282    | 2.301                                                           |
| <b>(DFT)</b>     | 2.294    | 2.260     | 2.288    | 2.287    | 2.305                                                           |
| <b>C=O (Å)</b>   | 1.212(8) | 1.212(9)  | 1.19(2)  | -        | 1.181                                                           |
| <b>(XRD)</b>     | 1.214(8) | 1.214(9)  | 1.23(1)  |          | 1.219                                                           |
| <b>C=O (Å)</b>   | 1.216    | 1.216     | 1.219    | 1.220    | 1.216                                                           |
| <b>(DFT)</b>     | 1.219    | 1.216     | 1.219    | 1.220    | 1.217                                                           |
| <b>C-O (Å)</b>   | 1.299(8) | 1.276(9)  | 1.25(1)  | -        | 1.293                                                           |
| <b>(XRD)</b>     | 1.310(8) | 1.30(1)   | 1.31(1)  |          | 1.305                                                           |
| <b>C-O (Å)</b>   | 1.300    | 1.288     | 1.301    | 1.300    | 1.301                                                           |
| <b>(DFT)</b>     | 1.301    | 1.290     | 1.301    | 1.300    | 1.302                                                           |
| <b>O-I-N (°)</b> | 173.6(2) | 173.2(2)  | 175.6(4) | -        | 174.50                                                          |
| <b>(XRD)</b>     | 175.4(2) | 174.1(2)  | 176.2(6) |          | 175.69                                                          |
| <b>O-I-N (°)</b> | 176.5    | 176.4     | 176.2    | 176.0    | 176.1                                                           |
| <b>(DFT)</b>     | 176.6    | 176.5     | 176.2    | 176.4    | 176.3                                                           |

‡ There were no esds available for (phthaloyl-OI)(pyridine)<sub>2</sub> (BZPRIB) on the CSD.<sup>10</sup>

## Computational structures

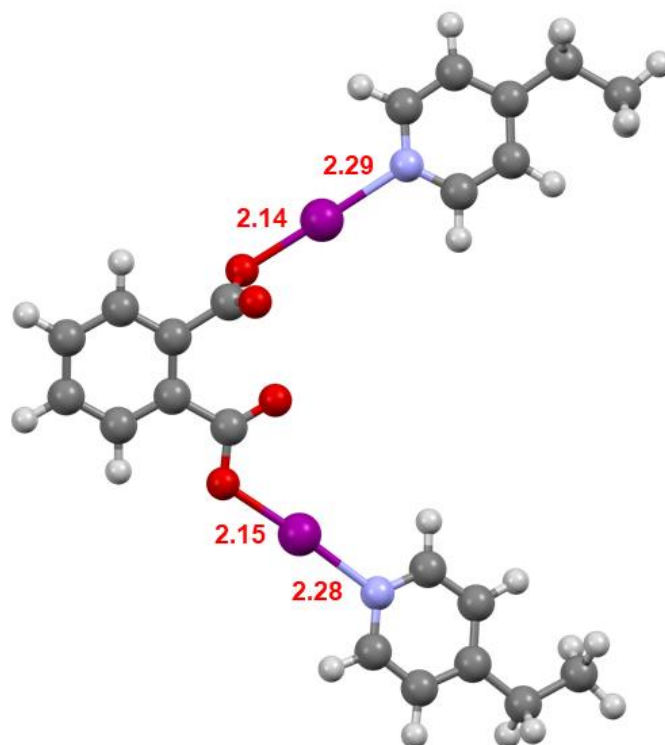

Figure S14: The computationally generated geometry of **1** (all bond lengths in Å).

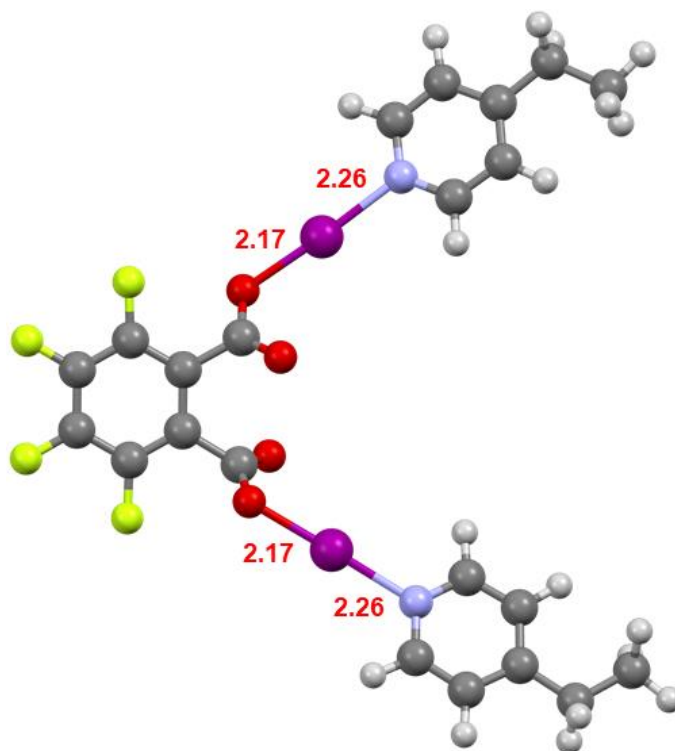

Figure S15: The computationally generated geometry of **1F** (all bond lengths in Å).

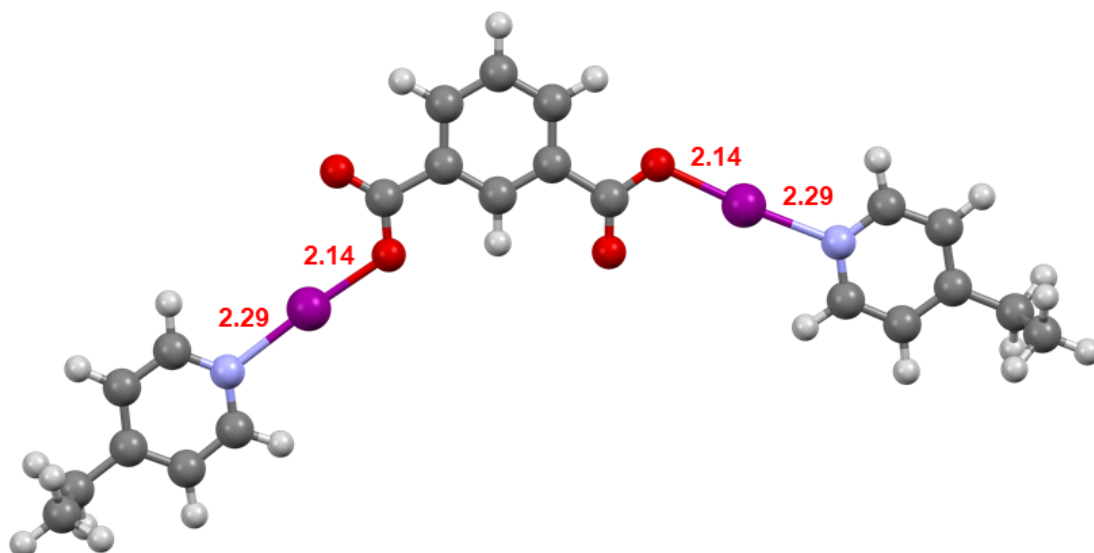

Figure S16: The computationally generated geometry of **2** (all bond lengths in Å).

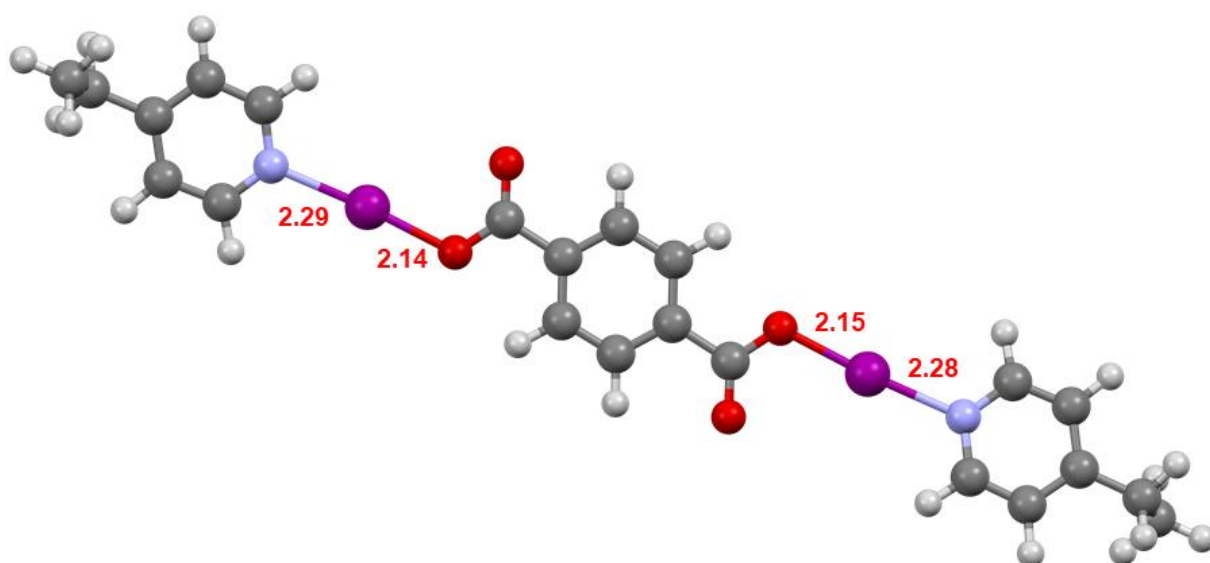

Figure S17: The computationally generated geometry of **3** (all bond lengths in Å).

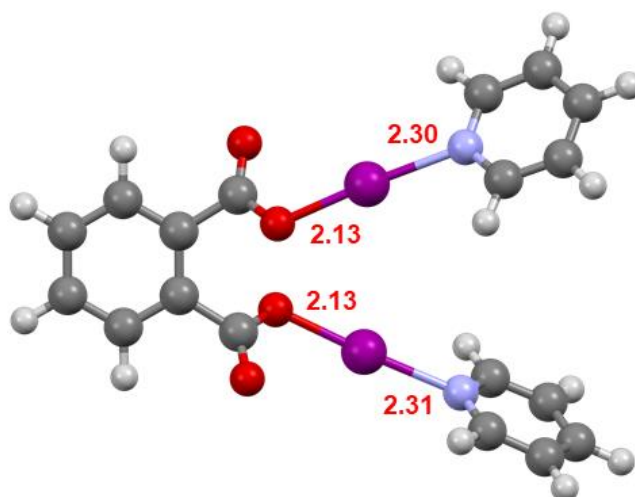

Figure S18: The computationally generated geometry of (phthaloyl-OI)(pyridine)<sub>2</sub> (**BZPRIB**; all bond lengths in Å), the synthesis of which has been previously described.<sup>5</sup>

## Cartesian Coordinates

### Compound 1

|   |           |           |           |
|---|-----------|-----------|-----------|
| H | 1.579205  | -7.146650 | -3.723734 |
| C | 1.256492  | -6.141611 | -3.483377 |
| C | 0.443213  | -3.650978 | -2.768311 |
| C | 1.083171  | -5.191397 | -4.491790 |
| C | 1.016876  | -5.804027 | -2.170352 |
| N | 0.616338  | -4.575290 | -1.824455 |
| C | 0.666118  | -3.922009 | -4.106177 |
| H | 1.141564  | -6.516222 | -1.364561 |
| H | 0.509768  | -3.134512 | -4.829578 |
| H | 0.118161  | -2.673770 | -2.433555 |
| C | -0.524076 | -2.320927 | 4.327477  |
| C | -1.078600 | -2.072919 | 7.047062  |
| C | -0.811759 | -3.446075 | 5.097016  |
| C | -0.511210 | -1.063078 | 4.932250  |
| C | -0.789652 | -0.946786 | 6.289704  |
| C | -1.089941 | -3.326375 | 6.449514  |
| H | -0.819531 | -4.416521 | 4.620130  |
| H | -0.777043 | 0.032375  | 6.753505  |
| H | -1.316105 | -4.207837 | 7.035197  |
| H | -1.294195 | -1.969992 | 8.103020  |
| C | -0.249301 | -2.455550 | 2.853998  |
| O | -0.164105 | -1.473303 | 2.137519  |
| O | -0.124894 | -3.685543 | 2.449304  |
| I | 0.236345  | -4.053433 | 0.366352  |
| C | 1.349765  | -5.569617 | -5.923322 |
| H | 0.723339  | -6.434897 | -6.156866 |
| H | 2.380839  | -5.929494 | -5.980892 |
| C | 1.122659  | -4.467649 | -6.945517 |
| H | 1.770111  | -3.610349 | -6.755139 |
| H | 0.088021  | -4.121467 | -6.932364 |
| H | 1.340679  | -4.838348 | -7.946220 |
| C | -0.160753 | 0.205807  | 4.193090  |
| O | 0.994192  | 0.574041  | 4.096220  |
| O | -1.208687 | 0.862312  | 3.793117  |
| I | -0.919176 | 2.655967  | 2.658286  |
| H | 0.350060  | 5.572669  | -1.573281 |
| C | -0.085408 | 5.667215  | -0.588703 |
| C | -1.163982 | 5.746814  | 1.909439  |
| C | -0.218626 | 4.532773  | 0.191820  |
| C | -0.509643 | 6.896111  | -0.095465 |
| C | -1.060578 | 6.914575  | 1.187351  |
| N | -0.746080 | 4.576348  | 1.413845  |
| H | 0.103531  | 3.560818  | -0.160820 |
| H | -1.407812 | 7.842531  | 1.623561  |
| H | -1.584815 | 5.726017  | 2.906711  |
| C | -0.396870 | 8.178774  | -0.873664 |

|   |           |          |           |
|---|-----------|----------|-----------|
| H | 0.183819  | 8.879482 | -0.267347 |
| H | -1.399036 | 8.610651 | -0.942949 |
| C | 0.216932  | 8.052616 | -2.258500 |
| H | 1.232274  | 7.656265 | -2.206655 |
| H | 0.261624  | 9.030342 | -2.736400 |
| H | -0.373217 | 7.392125 | -2.895491 |

### Compound 1F

|   |           |           |           |
|---|-----------|-----------|-----------|
| H | 1.540394  | -7.110681 | -3.713330 |
| C | 1.267101  | -6.089441 | -3.480967 |
| C | 0.576312  | -3.555398 | -2.785937 |
| C | 1.112087  | -5.146379 | -4.499223 |
| C | 1.071366  | -5.725332 | -2.168529 |
| N | 0.730926  | -4.474825 | -1.833407 |
| C | 0.758791  | -3.854700 | -4.123385 |
| H | 1.182615  | -6.430499 | -1.354874 |
| H | 0.621888  | -3.070487 | -4.854157 |
| H | 0.299579  | -2.561322 | -2.458198 |
| C | -0.662176 | -2.357633 | 4.317023  |
| C | -0.992161 | -2.051872 | 7.064096  |
| C | -0.959239 | -3.443264 | 5.119736  |
| C | -0.538369 | -1.095769 | 4.901320  |
| C | -0.700106 | -0.959263 | 6.263489  |
| C | -1.129209 | -3.298048 | 6.487474  |
| C | -0.540187 | -2.505373 | 2.816548  |
| O | -1.102303 | -1.710012 | 2.087533  |
| O | 0.185056  | -3.509015 | 2.456158  |
| I | 0.417105  | -3.927234 | 0.336510  |
| C | 1.327020  | -5.558224 | -5.929686 |
| H | 0.647287  | -6.389678 | -6.136009 |
| H | 2.334206  | -5.977800 | -6.002629 |
| C | 1.140147  | -4.460742 | -6.964601 |
| H | 1.842157  | -3.640795 | -6.805147 |
| H | 0.128408  | -4.053552 | -6.932844 |
| H | 1.310672  | -4.860072 | -7.963441 |
| C | -0.163531 | 0.110789  | 4.063524  |
| O | 0.912871  | 0.145327  | 3.501311  |
| O | -1.078106 | 1.019144  | 4.056802  |
| I | -0.803910 | 2.770091  | 2.797089  |
| H | 0.402234  | 5.527282  | -1.521821 |
| C | -0.034022 | 5.647055  | -0.540513 |
| C | -1.109196 | 5.794769  | 1.957736  |
| C | -0.127878 | 4.541222  | 0.284087  |
| C | -0.499512 | 6.880140  | -0.096401 |
| C | -1.045427 | 6.933741  | 1.187710  |
| N | -0.655787 | 4.619237  | 1.505508  |
| H | 0.222304  | 3.566141  | -0.030109 |
| H | -1.423348 | 7.866064  | 1.586991  |
| H | -1.527480 | 5.799721  | 2.955992  |

|   |           |           |           |
|---|-----------|-----------|-----------|
| C | -0.440286 | 8.130386  | -0.930597 |
| H | 0.121118  | 8.877684  | -0.362904 |
| H | -1.458352 | 8.522489  | -1.005294 |
| C | 0.160109  | 7.965822  | -2.317388 |
| H | 1.193045  | 7.618289  | -2.265016 |
| H | 0.153078  | 8.921032  | -2.840742 |
| H | -0.409165 | 7.250981  | -2.913646 |
| F | -1.131983 | -4.661793 | 4.611104  |
| F | -1.429288 | -4.348045 | 7.242260  |
| F | -1.140605 | -1.906867 | 8.374177  |
| F | -0.556251 | 0.226707  | 6.856618  |

## Compound 2

|   |           |           |           |
|---|-----------|-----------|-----------|
| C | 0.543210  | 3.009452  | -3.692489 |
| C | 0.462789  | 2.895637  | -0.916834 |
| C | 0.430858  | 1.778634  | -3.051164 |
| C | 0.614981  | 4.178144  | -2.949436 |
| C | 0.575905  | 4.123340  | -1.562672 |
| C | 0.390410  | 1.725481  | -1.663674 |
| C | 0.354876  | 0.528796  | -3.886703 |
| O | 0.390356  | 0.582420  | -5.104439 |
| O | 0.251342  | -0.564950 | -3.190754 |
| C | 0.416617  | 2.798078  | 0.584603  |
| O | 0.298507  | 1.720959  | 1.143090  |
| O | 0.513541  | 3.945775  | 1.190222  |
| I | 0.110166  | -2.444808 | -4.206332 |
| I | 0.486411  | 4.001059  | 3.333684  |
| H | 0.302742  | 0.775786  | -1.155198 |
| H | 0.632114  | 5.030357  | -0.976542 |
| H | 0.702006  | 5.133574  | -3.450337 |
| H | 0.572941  | 3.036657  | -4.773802 |
| N | 0.476234  | 4.209162  | 5.611286  |
| C | 0.482558  | 4.453494  | 8.372868  |
| C | 0.406015  | 3.120286  | 6.381056  |
| C | 0.549131  | 5.416412  | 6.177569  |
| C | 0.553249  | 5.574037  | 7.548472  |
| C | 0.405832  | 3.206084  | 7.758541  |
| H | 0.352408  | 2.168670  | 5.867474  |
| H | 0.607776  | 6.262619  | 5.504733  |
| H | 0.616535  | 6.568908  | 7.970293  |
| H | 0.351117  | 2.300525  | 8.348876  |
| C | 0.434837  | 4.590084  | 9.865226  |
| H | 1.021998  | 5.458366  | 10.167009 |
| H | 0.881313  | 3.706651  | 10.323494 |
| C | -1.009797 | 4.749954  | 10.348755 |
| H | -1.466275 | 5.637410  | 9.908042  |
| H | -1.038173 | 4.849975  | 11.433402 |
| H | -1.607727 | 3.882587  | 10.066032 |
| H | -0.188422 | -5.947863 | -8.171605 |

|   |           |           |           |
|---|-----------|-----------|-----------|
| C | -0.170740 | -5.884328 | -7.091103 |
| C | -0.111553 | -5.608371 | -4.384619 |
| C | -0.232184 | -7.035211 | -6.308463 |
| C | -0.080582 | -4.648268 | -6.484603 |
| N | -0.051847 | -4.520080 | -5.155281 |
| C | -0.203153 | -6.875434 | -4.925815 |
| H | -0.026970 | -3.732131 | -7.059079 |
| H | -0.247055 | -7.733882 | -4.268103 |
| H | -0.082345 | -5.444846 | -3.314650 |
| C | -0.379600 | -8.389838 | -6.934878 |
| H | 0.188867  | -8.419645 | -7.865639 |
| H | 0.033338  | -9.144941 | -6.265068 |
| C | -1.852521 | -8.698548 | -7.220391 |
| H | -2.275029 | -7.959710 | -7.902707 |
| H | -2.434255 | -8.682672 | -6.297743 |
| H | -1.952749 | -9.683849 | -7.674602 |

### Compound 3

|   |           |           |           |
|---|-----------|-----------|-----------|
| C | 0.056480  | 0.118256  | -1.434701 |
| C | -0.101512 | -0.056087 | 1.331693  |
| C | -0.147450 | -1.116834 | -0.826885 |
| C | 0.181676  | 1.262527  | -0.663576 |
| C | 0.102883  | 1.178946  | 0.723973  |
| C | -0.225874 | -1.200376 | 0.560747  |
| C | -0.277806 | -2.340747 | -1.695417 |
| O | -0.188939 | -2.264537 | -2.908913 |
| O | -0.488138 | -3.437673 | -1.029504 |
| C | 0.232179  | 2.402418  | 1.593858  |
| O | 0.132210  | 2.324110  | 2.806605  |
| O | 0.453506  | 3.499216  | 0.932233  |
| I | -0.687942 | -5.289624 | -2.091791 |
| I | 0.665846  | 5.344746  | 2.009064  |
| H | -0.384111 | -2.161312 | 1.030041  |
| H | 0.340518  | 2.223495  | -1.132681 |
| H | 0.115523  | 0.170195  | -2.513567 |
| N | 0.912302  | 7.371290  | 3.028993  |
| C | 1.205763  | 9.829813  | 4.275509  |
| C | 1.283803  | 8.441484  | 2.321701  |
| C | 0.682839  | 7.490249  | 4.339264  |
| C | 0.820422  | 8.698623  | 4.991155  |
| C | 1.440081  | 9.680013  | 2.910995  |
| H | 1.453235  | 8.286279  | 1.263672  |
| H | 0.381524  | 6.590324  | 4.860395  |
| H | 0.623039  | 8.756447  | 6.053896  |
| H | 1.740241  | 10.524569 | 2.304373  |
| C | 1.415554  | 11.146922 | 4.960847  |
| H | 0.715080  | 11.236395 | 5.792306  |
| H | 1.209999  | 11.956533 | 4.259448  |
| C | 2.851992  | 11.264416 | 5.479857  |



|   |           |            |           |
|---|-----------|------------|-----------|
| H | 3.067952  | 10.470075  | 6.195648  |
| H | 2.999403  | 12.224091  | 5.974321  |
| H | 3.564907  | 11.186136  | 4.657879  |
| H | -1.088817 | -8.712117  | -6.121926 |
| C | -1.073136 | -8.666135  | -5.040495 |
| C | -1.015161 | -8.435660  | -2.329878 |
| C | -1.171866 | -9.826961  | -4.276364 |
| C | -0.947112 | -7.443078  | -4.414358 |
| N | -0.918736 | -7.337576  | -3.083026 |
| C | -1.143428 | -9.690484  | -2.891176 |
| H | -0.863369 | -6.519916  | -4.973736 |
| H | -1.214921 | -10.557541 | -2.247383 |
| H | -0.984623 | -8.290009  | -1.257420 |
| C | -1.356145 | -11.166632 | -4.924850 |
| H | -0.786815 | -11.197432 | -5.855023 |
| H | -0.965834 | -11.943601 | -4.266467 |
| C | -2.836471 | -11.429734 | -5.217594 |
| H | -3.236509 | -10.669545 | -5.890008 |
| H | -3.419787 | -11.410979 | -4.295999 |
| H | -2.962989 | -12.405188 | -5.686212 |
| H | -0.161468 | -0.107789  | 2.410478  |

#### BZPRIB

|   |           |           |           |
|---|-----------|-----------|-----------|
| I | 0.282693  | -2.253703 | 0.247950  |
| O | 1.701183  | -1.182743 | 1.427132  |
| O | 3.429665  | -1.788042 | 0.135883  |
| C | 2.948302  | -1.152587 | 1.055914  |
| C | 2.001287  | 1.526627  | 2.014939  |
| O | 1.854072  | 1.588378  | 0.722900  |
| O | 1.207266  | 1.937460  | 2.839715  |
| I | 0.000941  | 2.283338  | -0.066899 |
| C | 3.798736  | -0.268294 | 1.926525  |
| C | 5.065420  | -0.714635 | 2.282176  |
| H | 5.416561  | -1.660702 | 1.890760  |
| C | 5.858551  | 0.035476  | 3.139601  |
| H | 6.841917  | -0.322050 | 3.417003  |
| C | 5.385262  | 1.239363  | 3.644892  |
| H | 5.999869  | 1.828154  | 4.313715  |
| C | 4.122699  | 1.691866  | 3.288875  |
| H | 3.749175  | 2.634030  | 3.669473  |
| C | 3.328557  | 0.947838  | 2.425288  |
| N | -1.353812 | -3.356303 | -0.936091 |
| C | -3.311170 | -4.677400 | -2.343902 |
| C | -1.041672 | -4.007568 | -2.058396 |
| C | -2.613425 | -3.344808 | -0.495205 |
| C | -3.624285 | -3.997530 | -1.176109 |
| C | -1.998816 | -4.682736 | -2.793005 |
| H | -0.002672 | -3.978277 | -2.360821 |
| H | -2.799686 | -2.799240 | 0.421257  |

|   |           |           |           |
|---|-----------|-----------|-----------|
| H | -4.633834 | -3.968621 | -0.791307 |
| H | -1.712411 | -5.200780 | -3.697312 |
| H | -4.081752 | -5.197574 | -2.897668 |
| N | -1.942971 | 3.014965  | -1.065958 |
| C | -4.245263 | 3.919585  | -2.264854 |
| C | -1.931003 | 3.358566  | -2.355695 |
| C | -3.069605 | 3.108475  | -0.356820 |
| C | -4.246754 | 3.558844  | -0.925344 |
| C | -3.068800 | 3.817573  | -2.992557 |
| H | -0.984982 | 3.259408  | -2.872821 |
| H | -3.011184 | 2.814934  | 0.683607  |
| H | -5.141728 | 3.622859  | -0.322888 |
| H | -3.024926 | 4.088649  | -4.037770 |
| H | -5.151406 | 4.277206  | -2.736185 |

## References

- 1 Agilent Technologies Ltd, 2014.
- 2 G. M. Sheldrick, *Acta Crystallogr. Sect. A Found. Adv.*, 2015, **71**, 3–8.
- 3 O. V. Dolomanov, L. J. Bourhis, R. J. Gildea, J. A. K. Howard and H. Puschmann, *J. Appl. Crystallogr.*, 2009, **42**, 339–341.
- 4 G. M. Sheldrick, *Acta Crystallogr. Sect. C, Struct. Chem.*, 2015, **71**, 3–8.
- 5 H. Hartl and M. Hedrich, *Zeitschrift für Naturforsch. B*, 1981, **36b**, 922–928.
- 6 Y. Zhao and D. G. Truhlar, *Theor. Chem. Acc.*, 2008, **120**, 215–241.
- 7 Spartan'18, Wavefunction Inc., Irvine CA, USA 2018.
- 8 X. Zhang and J. M. Herbert, *J. Phys. Chem. B*, 2014, **118**, 7806–7817.
- 9 A. W. Lange and J. M. Herbert, *Chem. Phys. Lett.*, 2011, **509**, 77–87.
- 10 C. R. Groom, I. J. Bruno, M. P. Lightfoot and S. C. Ward, *Acta Crystallogr. Sect. B*, 2016, **72**, 171–179.
